# Supplementary material for: A multi-ethnic proteomic profiling analysis in Alzheimer’s disease identifies the disparities in dysregulation of proteins and pathogenesis
Source: PeerJ. 2024 Jul 18;12:e17643. doi: 10.7717/peerj.17643 (PMC11260413; doi:10.7717/peerj.17643)
Supplement: Supplemental Information 9 [file peerj-12-17643-s009.xlsx]

## Sheet: Pt info&Clinical characteristic
Patient	Gender	Race	Living Area	Marital Status	Living situation	Highest Education	Highest Certificate	Height	Weight	Systolic Pressure	Family history of AD	Medical Conditions/ History	History of head injury	Employment status	Occupation (Previous /Current)
PC1	Female	Chinese	Town Area	Married	With spouse	Polytechnique/University/ College	Bachelor's Degree	160	50	112	No	Diabetes mellitus	No	Retired	Nurse
PC2	Female	Chinese	Town Area	Widow	Family members	Secondary	SPM	150	44	110	No	Asthma	Yes	Unemployed	-
												Arthritis
												Osteoporosis
PC3	Female	Chinese	City Area	Widow	With maid	No formal	None	155	51.5	118	No	Hypertension	No	Retired	Businessman
												Visual disease
												Arthritis
PC4	Male	Chinese	Town Area	Married	Family members	Polytechnique/University/ College	Bachelor's Degree	160	56.5	119	Yes(Mother)	Hepatitis B Carrier	No	Retired	Accountant
PC5	Male	Chinese	Town Area	Married	With spouse	Polytechnique/University/ College	Diploma	167	65	119	No	Hypertension
												Visual disease	No	Retired
PM1	Male	Malay	Town Area	Married	Family members	Secondary	PMR	163	55.2	165	No	Hypertension	No	Retired	Coffee shop owner
												Visual disease
PM2	Female	Malay	Town Area	Married	Family members	Polytechnique/University/ College	Diploma	162	52	118	No	Hepatitis A	No	Retired	Teacher
PM3	Male	Malay	Town Area	Married	Family members	Polytechnique/University/ College	Master's Degree	164	63	118	No	Amyloidosis	No	Retired	General manager in development field
CC1	Male	Chinese	Town Area	Married	With spouse	Polytechnique/University/ College	Master's Degree	165	61	110	No	Visual disease	No	Self-employed	Electrical Engineer
												Cataract
												Hepatitis B/C
CC2	Female	Chinese	Town Area	Widow	Old folk home	Primary	No	158	51	123	Yes(sister)	Diabetes mellitus	No	Retired	Unemployed
												Hypertension
CM1	Female	Malay	Town Area	Married	Family members	Secondary	SPM	152.4	48	115	No	Diabetes mellitus	No	Retired	Teacher
												Hypertension
												Visual disease
												Heart disease
												Asthma
												Arthritis
												Hyperthyroid
CM2	Male	Malay	Village	Married	Family members	Polytechnique/University/ College	Master's Degree	160	68	118	No	Heart disease	No	Retired	Libarian

## Sheet: Physical Activities part123
Patient	Q3	Q4	Q5	Q6	Q7	Q8	Q9	Q10	Q11	Q12	Q13	Q14	Q15	Q16	Q17
PC1	skip	skip	skip	skip	2-3 days	Private transport	1-3 times	10-30 mins	No	skip	10 -20 mins	Dining	Moderate	>30 mins	< 1h
												Exercise
												Run errands
												Medical appointments
PC2	skip	skip	skip	skip	<2	Private transport	1-3 times	10-30 mins	No	skip	<10 mins	Dining	Light	10-30 mins	2-3 h
												Medical appointments
PC3	skip	skip	skip	skip	Never	Private transport	Never	30mins-1h	No	skip	<10 mins	Dining	No	No	<1 h
												House visit
												Run errands
												Medical appointments
PC4	skip	skip	skip	skip	2- 3 days	Private transport	1-3 times	10-30 mins	No	skip	<10 mins	Medical appointments	Light	<10 mins	>3 h
PC5	skip	skip	skip	skip	4-5 days	Private transport	Never	10-30 mins	No	skip	<10 mins	Entertainment	Light	10-30 mins	>3 h
						Walking						Medical appointments
PM1	skip	skip	skip	skip	2-3 days	Private transport	Never	10-30 mins	No	skip	<10 mins	Dining	Light	<10 mins	>3 h
												House visit
												Entertainment
												Run errands
												Medical appointments
PM2	skip	skip	skip	skip	Never	Private transport	Never	10-30 mins	No	skip	20-30 mins	Dining	Light	10-30 mins	>3 h
												Exercise
												Medical appointments
PM3	skip	skip	skip	skip	Everyday	Private transport	4-5 times	10-30 mins	No	skip	10-20 mins	Dining	Light	10-30 mins	>3h
												Medical appointments
CC1	1-3 times	Never	WFH	<10 mins	2-3 days	Private transport	1-3 times	<10 mins	No	skip	<10 mins	Run errands	Moderate	<10 mins	>3h
												Medical appointments
CC2	skip	skip	skip	skip	Never	Private transport	1-3 times	30 mins-1 hours	No	skip	No	Medical appointments	Light	<10 mins	<1 h
CM1	skip	skip	skip	skip	Never	Private transport	1-3 times	30 mins-1 hours	No	skip	No	Medical appointments	Light	10-30 mins	2-3h
CM2	skip	skip	skip	skip	2-3 days	Private transport	1-3 times	10-30 mins	No	skip	<10 mins	Run errands	Light	10-30 mins	<1 h
												Medical appointments

## Sheet: Lifestyle and Diet
Patient	Duration of night sleep	No. of times wake up at night	Smoker	Duration of smoking	No. of cigarettes	Skip			Eating style	Eat/Drink					Alcohol		No. of alcohol
						Breakfast	Lunch	Dinner		Snack (Per week)	Fast food/Fried food/food high in salt and fat (Per week)	Sweet drinks (Per week)	Fruits (Per day)	Fruits (Per week *7)		How often
PC1	7-8h	1-2 times	No	skip	skip	Never	Never	Never	Well Balance	1-2 times	<1	<1	1	7	No	Skip	Skip
PC2	>8 h	Never	No	skip	skip	Never	1/2 times	1/2 times	Well Balance	Never	<1	>7	1	7	No	Skip	Skip
PC3	>8h	1-2 times	No	skip	skip	Never	Never	Never	Vegetarian	Never	<1	<1	1	7	Yes	On occasion	1 to 3
PC4	>8h	1-2 times	No	skip	skip	Never	Never	Never	Well Balance	Never	<1	<1	1	7	No	Skip	Skip
PC5	>8h	Never	Ex-smoker	10-20 years	20+	Never	Never	Never	Well Balance	1-2 times	<1	4-5 times	1	7	No	Skip	Skip
PM1	7-8h	1-2 times	Ex-smoker	>20 years	20+	Never	Never	Never	Well Balance	>2 times	<1	>7	>3	>21	No	Skip	No
PM2	>8h	1-2 times	No	skip	skip	Never	Never	Never	Well Balance	1-2 times	4-5 times	<1	2-3 fruits	14-21	No	No	No
PM3	6-7 times	1-2 times	Ex-smoker	less than 10 years	1-10 ciga	Never	Never	Never	Well Balance	Never	<1	<1	2-3 fruits	14-21	No	No	No
CC1	7-8h	1-2 times	Never	skip	skip	Never	Never	Never	Well Balance	Never	<1	2-3 times	2-3 fruits	14-21	Yes	On occasion	1 to 3
CC2	<5 hours	1-2 times	Never	skip	skip	Never	Never	Never	Well Balance	1-2 times	<1	<1	1	7	No	Skip	Skip
CM1	7-8 h	1-2 times	Never	skip	skip	Never	Never	Never	Well Balance	1-2 times	<1	<1	2-3 fruits	14-21	No	Skip	Skip
CM2	7-8 h	1-2 times	Ex-smoker	10-20 years	11-20 ciga	Never	Never	Never	Well Balance	>2 times	4-5 times	2-3 times	2-3 fruits	14-21	No	No	No
